# Supplementary material for: Neural crest cell plasticity and its limits
Source: Oxford University Press journal article supplement (doi:10.1242/dev.01350), 2004-09-09
Supplement: dev01350-sup-supptable.pdf [file dev01350-sup-supptable.pdf]

**Table S1. Progenitors with both mesectodermal and neural-melanocytic potentials in the cephalic neural crest**

Types of mixed progeny (number from total clones)\*

| GNMC  | GNMF   | GMFC  | GNC   | GMC   | GNF   | GMF    | GC    | GF    | Reference                                   |
|-------|--------|-------|-------|-------|-------|--------|-------|-------|---------------------------------------------|
| 0/173 | n.d.   | n.d.  | 0/173 | 0/173 | n.d.  | n.d.   | 7/173 | n.d.  | Baroffio et al. (1988) <sup>†</sup>         |
| 0/165 | n.d.   | n.d.  | 0/165 | 0/165 | n.d.  | n.d.   | 3/165 | n.d.  | Dupin et al. (1990) <sup>†</sup>            |
| 1/305 | n.d.   | n.d.  | 1/305 | 0/305 | n.d.  | n.d.   | 6/305 | n.d.  | Baroffio et al. (1991) <sup>†</sup>         |
| 0/36  | 1/36   | 1/36  | 0/36  | 1/36  | 0/36  | 0/36   | 0/36  | 1/36  | Trentin et al. (2004) <sup>‡</sup>          |
| 0/163 | 11/163 | 1/163 | 0/163 | 0/163 | 2/163 | 17/163 | 0/163 | 7/163 | E.D. and N.M.L.D., unpublished <sup>‡</sup> |

\*Summary of the clone types derived from quail NCCs grown on feeder layers of 3T3 fibroblasts. Only those containing both neural-melanocytic and mesectodermal (cartilage and myofibroblasts) derivatives are considered here.

<sup>†</sup>Refers to clones derived from migratory NCC isolated from 9- to 12-somite stage (ss) embryos at the mesencephalic/anterior rhombencephalic level (the presence of myofibroblasts in these cultures was not determined; n.d.).

<sup>‡</sup>Refers to clones from NCCs obtained in primary cultures of mes-rhombencephalic neural primordium isolated at 4-6 ss.

In all experiments, single NCCs were aspirated from a diluted cell suspension and seeded in individual culture wells by micromanipulation to ensure culture clonality. After 9-15 days, the progeny was analyzed with cell type-specific markers to assess presence of melanocytes (M), glial cells (G) and PNS neurons (N). Mesectodermal cell types, chondrocytes (C) and myofibroblasts (F), were identified by differentiation of cartilage nodules and expression of  $\alpha$ -smooth muscle actin, respectively.
